# Supplementary material for: Evaluating DCA-based method performances for RNA contact prediction by a well-curated data set
Source: PubMed Central journal article supplement — RNA. 2020 Jul;26(7):794–802. doi: 10.1261/rna.073809.119 (PMC7297115; doi:10.1261/rna.073809.119), 2020-07
Supplement: supp_073809.119_Supplemental_Information.pdf [file supp_073809.119_Supplemental_Information.pdf]

## Supplementary Information

### Evaluating DCA-based method performances for RNA contact prediction by a well-curated dataset

F. Pucci\*, M. Zerihun\*, E. K. Peter and A. Schug,  
John von Neumann Institute for Computing, Forschungszentrum Jülich

- **Table 1.** Dataset of all RNA structures with their annotations (length, chain, PDB code, RFAM family, BIT-score, host organism)
- **Table 2.** Prediction results for all entries of the dataset and all methods tested (mean-field pydca, EVFold, Boltzmann learning, Gremlin, CCMPRED, PSICOV)
- **Table 3-5.** Impact of the search (Table 3), alignment (Table 4) and trim (Table 5) procedures on the mean-field DCA prediction performances for all entries of the dataset.
- **Table 6.** Impact of the contact definition on the performances of mean-field DCA for all entries in the dataset.

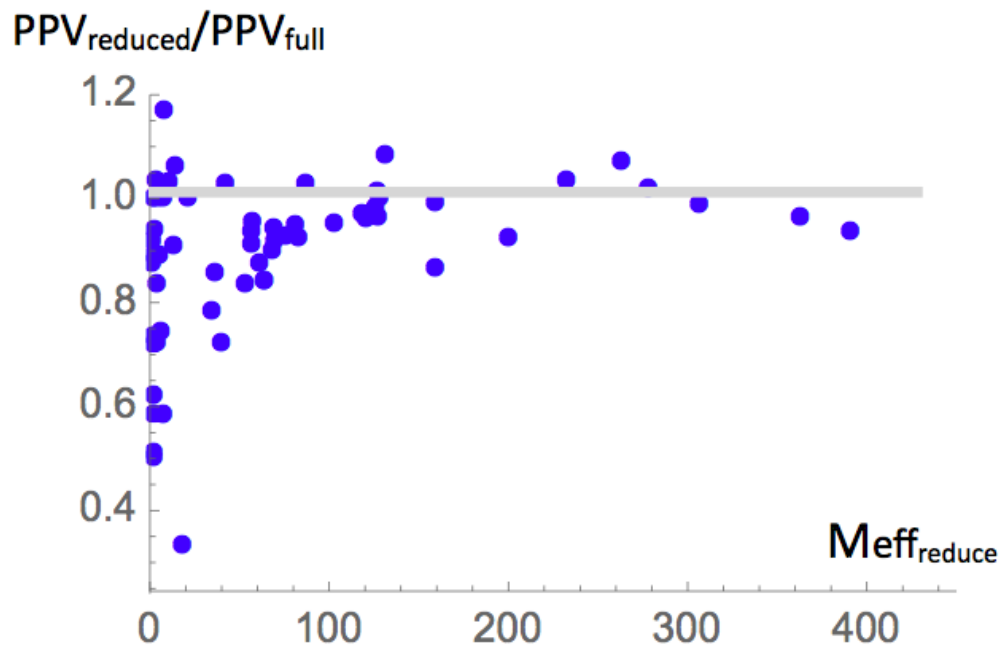

Figure 1: Ratio of the pydca PPVs computed for the full RFAM families ( $PPV_{full}$ ) and for randomly chosen subsets composed of 1/3 of their entries ( $PPV_{reduced}$ ) as a function of the number of effective sequences in the reduced subsets.
